# Supplementary material for: Sex and gender differences in treatment intention, quality of life and performance status in the first 100 patients with periampullary cancer enrolled in the CHAMP study
Source: Springer Nature journal article supplement (doi:10.1186/s12885-023-10720-w), 2023-04-11
Supplement: MOESM2 [file 25225574]

## Adjuvant

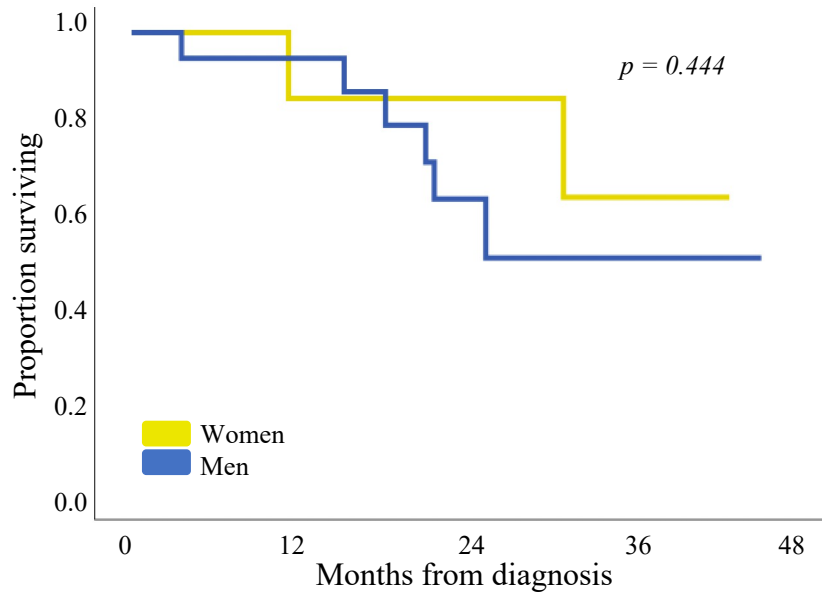

### Number at risk

|       |    |    |    |    |
|-------|----|----|----|----|
| Women | 7  | 6  | 0  | 5  |
| Men   | 18 | 17 | 13 | 12 |

## Palliative

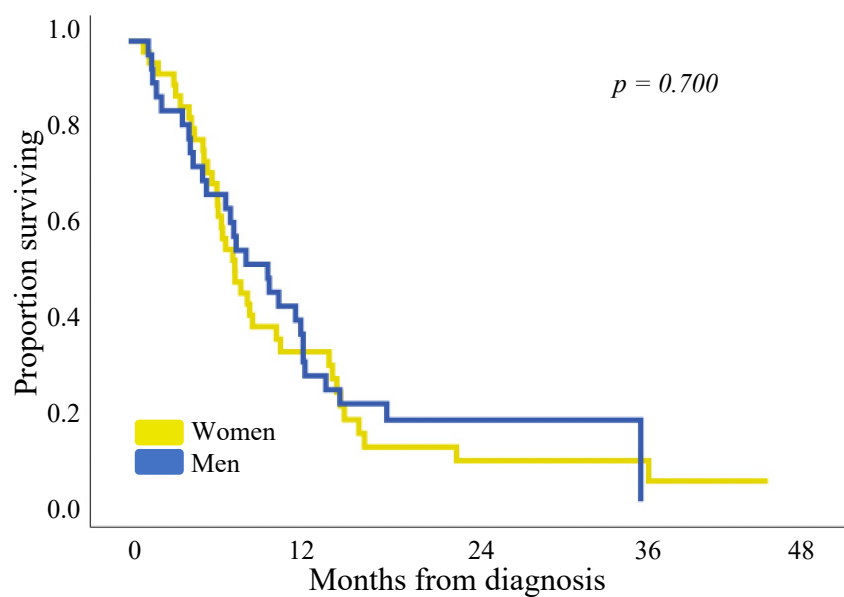

### Number at risk

|       |    |    |   |   |
|-------|----|----|---|---|
| Women | 42 | 14 | 6 | 6 |
| Men   | 33 | 12 | 6 | 5 |
